# Supplementary material
Source: PubMed Central journal article supplement (PMC6733256)
Supplement: NIHMS1048536-supplement-1.pdf [file NIHMS1048536-supplement-1.pdf]

953

954

955

956

957

958

959

960

961

962 **Supplementary Information**

963

964 *Figure S1.*

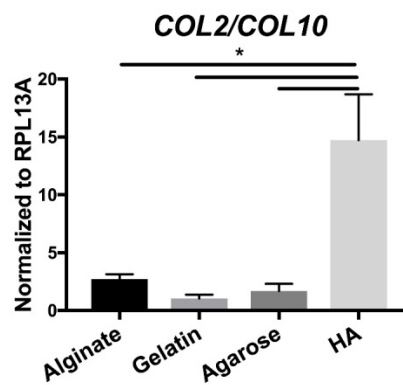

965

966 **Figure S1.** Ratio of *COL2/COL10* expression in MSCs undergoing chondrogenesis within in  
967 4 different chondrosupportive scaffolds after 21 days chondrogenesis. Values are presented  
968 as mean ± SD (N = 4; \*, p < 0.05).

969

970

971

972

973

974

975

976

977

978

979

980 *Figure S2.*

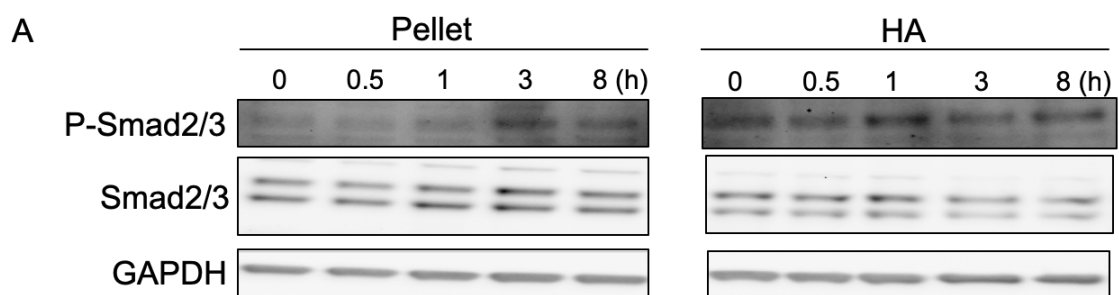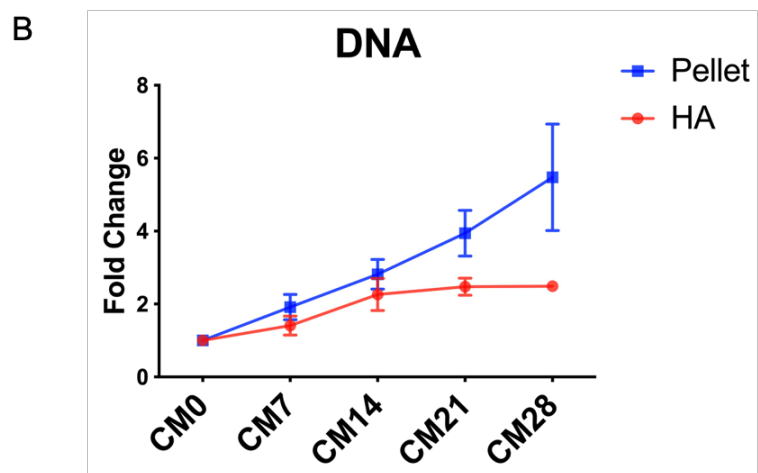

981

982 **Figure S2.** (A) Western blot analysis of MSC-formed pellet and MSC-laden HA constructs  
983 in chondrogenesis medium. Activation of Smad2/3 (phosphorylated-Smad2/3, P-Smad2/3)  
984 appeared earlier in HA culture than pellet culture. (B) Cell proliferation in Pellet or HA  
985 culture in 28 days. Cells in pellet had higher proliferation capacity than those in HA.

986

987

988

989

990

991

992

993 *Figure S3.*

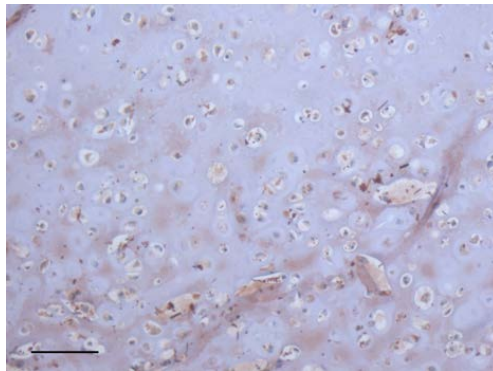

994

995 **Figure S3.** Collagen type X immunohistochemistry of samples from CM21 in HA group,  
996 indicating moderate deposition of collagen type X. Bar = 100  $\mu$ m.

997

998

999

1000

1001  
1002  
1003  
1004  
1005  
1006  
1007  
1008  
1009  
1010  
1011

*Figure S4.*

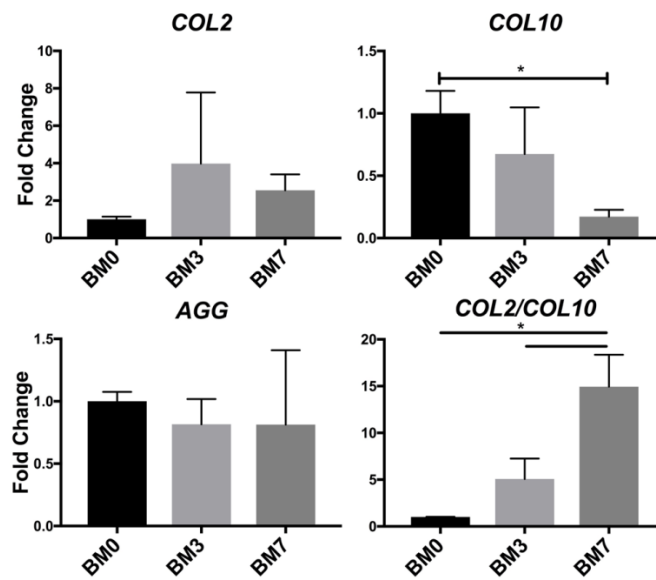

1012  
1013  
1014  
1015  
1016

**Figure S4.** MSC-laden HA constructs cultured in chondrogenic medium for 21 days, and then subjected to additional culture in BM for 0 (BM0), 3 (BM3) and 7 (BM7) days. Gene expression of *COL2*, *COL10*, *AGG* and *COL2/COL10* were analyzed. N=4; \*, p < 0.05.

1017  
1018  
1019  
1020  
1021  
1022  
1023  
1024  
1025  
1026  
1027  
1028  
1029  
1030  
1031  
1032  
1033

**Figure S5.**

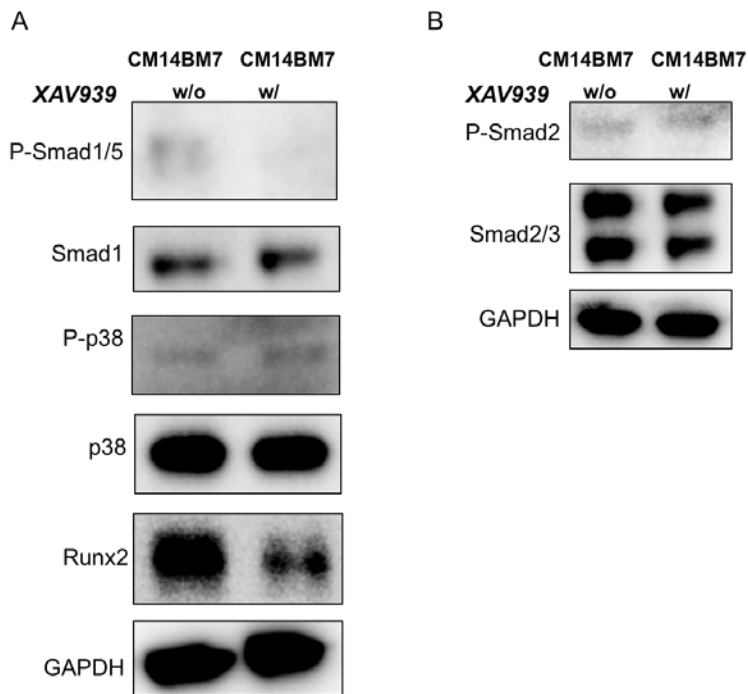

1034

1035 **Figure S5.** Analysis of signaling pathway perturbation by XAV939. (A) Western blot of  
1036 P-p38, p38, P-Smad1/5, Smad1, and Runx2 in DMSO or XAV-treated CM14BM7 HA

1037 groups, showing that XAV939 treatment (from days 10-21) significantly decreased  
1038 P-Smad1/5 and Runx2 levels. **(B)** Western blot of P-Smad2, Smad2/3 in DMSO or XAV-  
1039 treated CM14BM7 HA groups, showing that XAV939 treatment did not affect P-Smad2  
1040 level.

1041  
1042

1043

1044

1045

1046

1047

1048

1049

1050 *Figure S6.*

1051

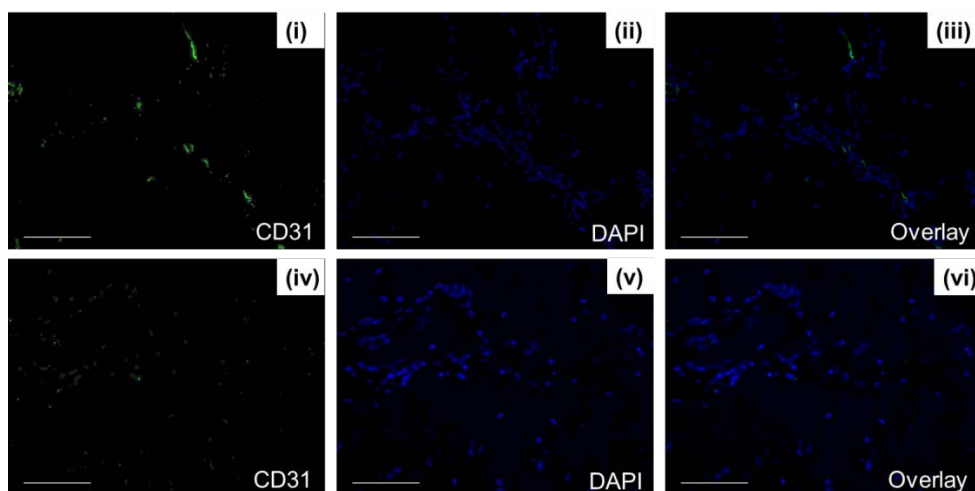

1052

1053 Figure S6. Assessment of vascularization in implanted MSC HA constructs.  
1054 Immunohistochemistry of CD31, a marker for endothelial cells showed that XAV-treated

1055 CM14BM7 HA implanted constructs (iv,v,vi) showed significantly less vascularization,  
1056 indicated by fewer CD31 positive endothelial cells, compared to the control, CM21 HA  
1057 constructs (i,ii,iii). Bar = 50  $\mu$ m.

1058

1059

1060

1061

1062

1063

1064

1065

1066

1067

| <b>Gene</b>     | <b>Forward Primer (5'-3')</b> | <b>Reverse Primer (5'-3')</b> |
|-----------------|-------------------------------|-------------------------------|
| <i>RPL13a</i>   | CATAGGAAGCTGGGAGCAAG          | GCCCTCCAATCAGTCTTCTG          |
| <i>18S rRNA</i> | GTAACCCGTTGAACCCCAT           | CCATCCAATCGGTAGTAGCG          |
| <i>COL2</i>     | GGATGGCTGCACGAAACATACCGG      | CAAGAAGCAGACCGGCCCTATG        |
| <i>AGG</i>      | AGTCACACCTGAGCAGCATC          | AGTTCTCAAATTGCATGGGGTGTC      |
| <i>COL10</i>    | CCCTCTTGTTAGTGCCAACC          | AGATTCCAGTCCTTGGGTCA          |
| <i>MMP-13</i>   | ATGCAGTCTTTCTTCGGCTTAG        | ATGCCATCGTGAAGTCTGGT          |
| <i>ALP</i>      | ATCTTTGGTCTGGCCCCCATG         | AGTCCACCATGGAGACATTCTCTC      |

|             |                        |                          |
|-------------|------------------------|--------------------------|
| <i>COLI</i> | ATGATTGTCTTTCCCATTCATT | GGGCTCTAATGATGTTGAACTTGT |
|-------------|------------------------|--------------------------|

1068

1069

1070

1071
